# Supplementary material for: The combined 410nm and infrared light effectively suppresses bacterial survival under realistic conditions
Source: Frontiers journal article supplement (doi:10.3389/fcimb.2025.1624160), 2025-08-01
Supplement: Data_Sheet_1.pdf [file Data_Sheet_1.pdf]

## Supplementary Materials

**Note:** In the supplementary tables 1-8, the Mean  $\pm$  SEM are displayed in the percentage of dead bacterial colonies (CFU). The initial time points, 0 minute (min) or hour (h) are not shown because all bacterial colonies are considered intact without having dead bacteria, indicating “0” consistently.

### 1 Supplementary Tables 1A: The termination rates of *E. coli* are listed in a time-dependent manner at 25cm. (Mean $\pm$ SEM)

| Time (min) | 10W               | 20W               | 24W               | White light       |
|------------|-------------------|-------------------|-------------------|-------------------|
| 3.75       | 1.68 $\pm$ 13.77  | 4.71 $\pm$ 8.35   | -0.75 $\pm$ 11.98 | 6.65 $\pm$ 16.20  |
| 7.5        | 4.29 $\pm$ 11.66  | 10.40 $\pm$ 7.64  | 8.11 $\pm$ 10.68  | 3.05 $\pm$ 17.00  |
| 15         | 23.37 $\pm$ 12.45 | 31.15 $\pm$ 10.99 | 30.92 $\pm$ 15.88 | 5.05 $\pm$ 12.54  |
| 30         | 61.17 $\pm$ 15.25 | 73.21 $\pm$ 11.08 | 69.95 $\pm$ 13.61 | 1.73 $\pm$ 17.60  |
| 60         | 93.19 $\pm$ 5.98  | 96.63 $\pm$ 4.25  | 95.31 $\pm$ 6.26  | -5.87 $\pm$ 30.32 |

### 2 Supplementary Tables 1B: The termination rates of *E. coli* are listed in a time-dependent manner at 50cm. (Mean $\pm$ SEM)

| Time (h) | 10W               | 20W              | 24W              | White light       |
|----------|-------------------|------------------|------------------|-------------------|
| 1        | 81.26 $\pm$ 11.65 | 86.54 $\pm$ 6.99 | 85.34 $\pm$ 8.81 | 0.89 $\pm$ 16.84  |
| 2        | 88.66 $\pm$ 8.27  | 90.85 $\pm$ 7.56 | 92.62 $\pm$ 6.70 | -2.08 $\pm$ 29.83 |
| 4        | 97.93 $\pm$ 2.59  | 99.66 $\pm$ 0.51 | 99.43 $\pm$ 0.76 | -5.89 $\pm$ 20.91 |

### 3 Supplementary Tables 1C: The termination rates of *E. coli* are listed in a time-dependent manner at 1m. (Mean $\pm$ SEM)

| Time (h) | 10W         | 20W         | 24W         | White light  |
|----------|-------------|-------------|-------------|--------------|
| 1        | 52.73±20.08 | 59.21±12.12 | 58.83±9.49  | -2.57±27.78  |
| 2        | 48.05±8.69  | 65.53±12.59 | 62.14±14.16 | -11.34±25.46 |
| 4        | 72.59±8.02  | 84.48±7.82  | 82.93±9.12  | -5.91±29.96  |
| 6        | 89.29±7.03  | 94.39±3.98  | 93.29±5.37  | 1.09±22.68   |

**4 Supplementary Tables 1D: The termination rates of *E. coli* are listed in a time-dependent manner at 2m. (Mean ± SEM)**

| Time (h) | 10W         | 20W         | 24W         | White light  |
|----------|-------------|-------------|-------------|--------------|
| 1        | 8.61±22.73  | 17.58±9.75  | 15.23±15.41 | 3.73±20.81   |
| 2        | 7.39±23.61  | 15.01±17.93 | 17.84±20.32 | -17.65±35.84 |
| 4        | 34.73±15.48 | 40.82±12.50 | 40.75±11.15 | -3.79±24.44  |
| 6        | 56.19±16.61 | 62.38±15.34 | 64.09±14.29 | 15.79±19.16  |
| 8        | 88.09±11.94 | 91.44±9.77  | 92.41±7.89  | 8.46±16.05   |

**5 Supplementary Tables 2A: The termination rates of *S. aureus* are listed in a time-dependent manner at 25cm. (Mean ± SEM)**

| Time (min) | 10W        | 20W        | 24W        | White light |
|------------|------------|------------|------------|-------------|
| 15         | 7.78±14.02 | 7.44±4.67  | 4.33±6.14  | 5.22±8.41   |
| 30         | 21±6.86    | 17.44±7.18 | 20.89±5.67 | -3.78±13.25 |
| 60         | 51.67±6.93 | 50.44±5.77 | 45.67±3.74 | 0.56±8.88   |

|            |            |            |            |           |
|------------|------------|------------|------------|-----------|
| <b>120</b> | 94.78±3.42 | 96.89±2.67 | 95.67±3.87 | 2.11±6.35 |
|------------|------------|------------|------------|-----------|

**6 Supplementary Tables 2B: The termination rates of *S. aureus* are listed in a time-dependent manner at 50cm. (Mean ± SEM)**

| <b>Time (h)</b> | <b>10W</b>  | <b>20W</b>  | <b>24W</b>  | <b>White light</b> |
|-----------------|-------------|-------------|-------------|--------------------|
| <b>1</b>        | 15.42±21.15 | 19.31±11.21 | 19.93±13.92 | -1.29±17.82        |
| <b>2</b>        | 32.49±5.79  | 41.13±6.71  | 42.76±8.77  | -0.16±8.14         |
| <b>4</b>        | 65.75±6.33  | 75.71±6.43  | 70.08±13.72 | -4.29±12.49        |
| <b>6</b>        | 98.35±1.51  | 99.02±1.12  | 98.79±1.10  | 3.13±13.10         |

**7 Supplementary Tables 2C: The termination rates of *S. aureus* are listed in a time-dependent manner at 1m. (Mean ± SEM)**

| <b>Time (h)</b> | <b>10W</b>  | <b>20W</b> | <b>24W</b>  | <b>White light</b> |
|-----------------|-------------|------------|-------------|--------------------|
| <b>1</b>        | 4.96±16.67  | 4.91±11.23 | 5.42±13.23  | -2.49±22.51        |
| <b>2</b>        | 14.43±11.87 | 18.78±7.86 | 19.14±9.90  | -2.83±13.44        |
| <b>4</b>        | 32.37±11.57 | 40.71±8.51 | 38.56±10.50 | 3.63±11.22         |
| <b>6</b>        | 67.41±10.18 | 81.49±6.30 | 78.03±8.50  | 0.36±15.25         |
| <b>8</b>        | 94.25±3.71  | 98.99±1.10 | 99.33±0.82  | 0.84±20.80         |

**8 Supplementary Tables 2D: The termination rates of *S. aureus* are listed in a time-dependent manner at 2m. (Mean ± SEM)**

| <b>Time (h)</b> | <b>10W</b> | <b>20W</b> | <b>24W</b>  | <b>White light</b> |
|-----------------|------------|------------|-------------|--------------------|
| <b>1</b>        | 8.61±22.73 | 17.58±9.75 | 15.23±15.41 | 3.73±20.81         |

|          |             |             |             |              |
|----------|-------------|-------------|-------------|--------------|
| <b>2</b> | 7.39±23.61  | 15.01±17.93 | 17.84±20.32 | -17.65±35.84 |
| <b>4</b> | 34.73±15.48 | 40.82±12.50 | 40.75±11.15 | -3.79±24.44  |
| <b>6</b> | 56.19±16.61 | 62.38±15.34 | 64.09±14.29 | 15.79±19.16  |
| <b>8</b> | 88.09±11.94 | 91.44±9.77  | 92.41±7.89  | 8.46±16.05   |

9 The relative levels of ROS were measured after 1.5 hours of light exposure.

| <b>Time (h)</b> | <b>No Light</b> | <b>W. Light</b> | <b>10 W</b>  | <b>20 W</b>   |
|-----------------|-----------------|-----------------|--------------|---------------|
| 1.5             | 60.19±25.97     | 48.89±39.71     | 137.95±56.37 | 204.66±107.59 |

**Supplementary Figure 1**

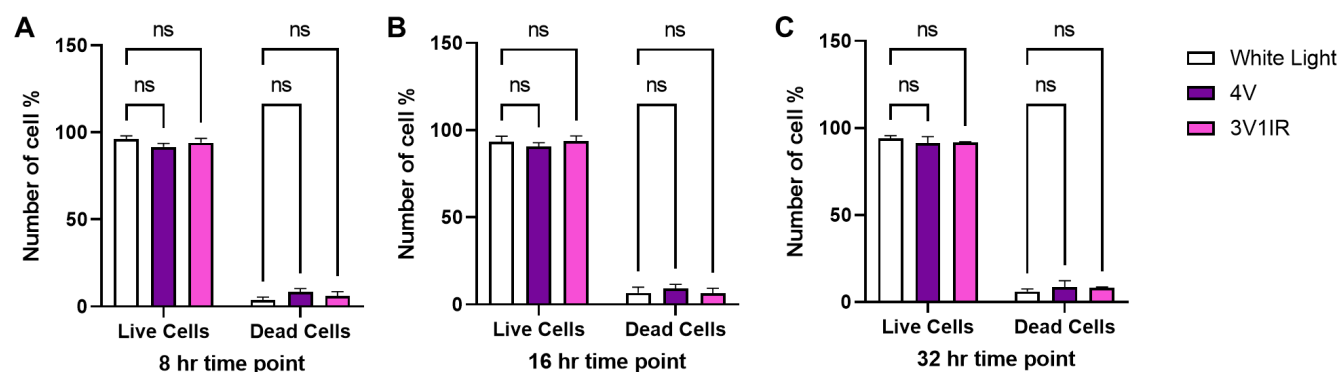

**SUPPLEMENTARY FIGURE 1.** The 4V or 3V1IR did not interfere with the normal growth of N27 rat dopamine cells, compared to white light control. Data are presented as mean  $\pm$ SEM and analyzed by using GraphPad Prism 10.01 software using One ANOVA, Dunnett's multiple comparisons test.
